# Supplementary material for: Discovery of a Novel Non-Narcotic Analgesic Derived from the CL-20 Explosive: Synthesis, Pharmacology, and Target Identification of Thiowurtzine, a Potent Inhibitor of the Opioid Receptors and the Ion Channels
Source: PubMed Central journal article supplement — ACS Omega. 2021 May 31;6(23):15400–11. doi: 10.1021/acsomega.1c01786 (PMC8210403; doi:10.1021/acsomega.1c01786), 2021-05-31

## Supporting information

# Discovery of a Novel Non-Narcotic Analgesic Derived from the CL-20 Explosive: Synthesis, Pharmacology and Target Identification of Thiowurtzine, a Potent Inhibitor of the Opioid Receptors and the Ion Channels

Stephanie Agüero,<sup>a,#</sup> Simon Megy,<sup>a,#</sup> Valeria V. Eremina,<sup>b</sup> Alexander I. Kalashnikov,<sup>b</sup> Svetlana G. Krylova,<sup>c</sup> Daria A. Kulagina,<sup>b,\*</sup> Ksenia A. Lopatina,<sup>c</sup> Mailys Fournier,<sup>a</sup> Tatyana N. Povetyeva,<sup>c</sup> Alexander B. Vorozhtsov,<sup>d</sup> Sergey V. Sysolyatin,<sup>b</sup> Vadim V. Zhdanov,<sup>c</sup> Raphael Terreux,<sup>a,\*</sup>

<sup>a</sup> Équipe ECMO, Laboratoire de Biologie Tissulaire et d'Ingénierie (LBTI), UMR5305, Université Lyon 1, Lyon, France

<sup>b</sup> Institute for Problems of Chemical and Energetic Technologies, Siberian Branch of the Russian Academy of Sciences (IPCET SB RAS), Biysk 659322, Altai Krai, Russia

<sup>c</sup> Goldberg Research Institute of Pharmacology and Regenerative Medicine, Tomsk National Research Medical Center of the Russian Academy of Sciences, Tomsk 634028, Russia

<sup>d</sup> National Research Tomsk State University, Lenin Avenue, 36, Tomsk 634050, Russia

### Table of Contents

|                                                                                                                                                       |    |
|-------------------------------------------------------------------------------------------------------------------------------------------------------|----|
| <sup>1</sup> H NMR spectrum of dibromothiophene ( <b>VIII</b> ) in DMSO- <i>d</i> <sub>6</sub>                                                        | S2 |
| <sup>13</sup> C NMR spectrum of dibromothiophene ( <b>VIII</b> ) in DMSO- <i>d</i> <sub>6</sub>                                                       | S2 |
| <sup>1</sup> H NMR spectrum of dibromothiophene carboxylic acid ( <b>IV</b> ) derived by carboxylation, in DMSO- <i>d</i> <sub>6</sub>                | S3 |
| <sup>13</sup> C NMR spectrum of dibromothiophene carboxylic acid ( <b>IV</b> ) derived by carboxylation, in DMSO- <i>d</i> <sub>6</sub>               | S4 |
| <sup>1</sup> H NMR spectrum of dibromothiophene aldehyde ( <b>IX</b> ) in DMSO- <i>d</i> <sub>6</sub>                                                 | S5 |
| <sup>13</sup> C NMR spectrum of dibromothiophene aldehyde ( <b>IX</b> ) in DMSO- <i>d</i> <sub>6</sub>                                                | S5 |
| <sup>1</sup> H NMR spectrum of dibromothiophene carboxylic acid ( <b>IV</b> ) derived from dibromothiophene aldehyde, in DMSO- <i>d</i> <sub>6</sub>  | S6 |
| <sup>13</sup> C NMR spectrum of dibromothiophene carboxylic acid ( <b>IV</b> ) derived from dibromothiophene aldehyde, in DMSO- <i>d</i> <sub>6</sub> | S7 |
| IR spectrum of thiowurtzine ( <b>I</b> )                                                                                                              | S8 |
| <sup>1</sup> H NMR spectrum of thiowurtzine ( <b>I</b> ) in DMSO- <i>d</i> <sub>6</sub>                                                               | S8 |
| <sup>13</sup> C NMR spectrum of thiowurtzine ( <b>I</b> ) in DMSO- <i>d</i> <sub>6</sub>                                                              | S9 |

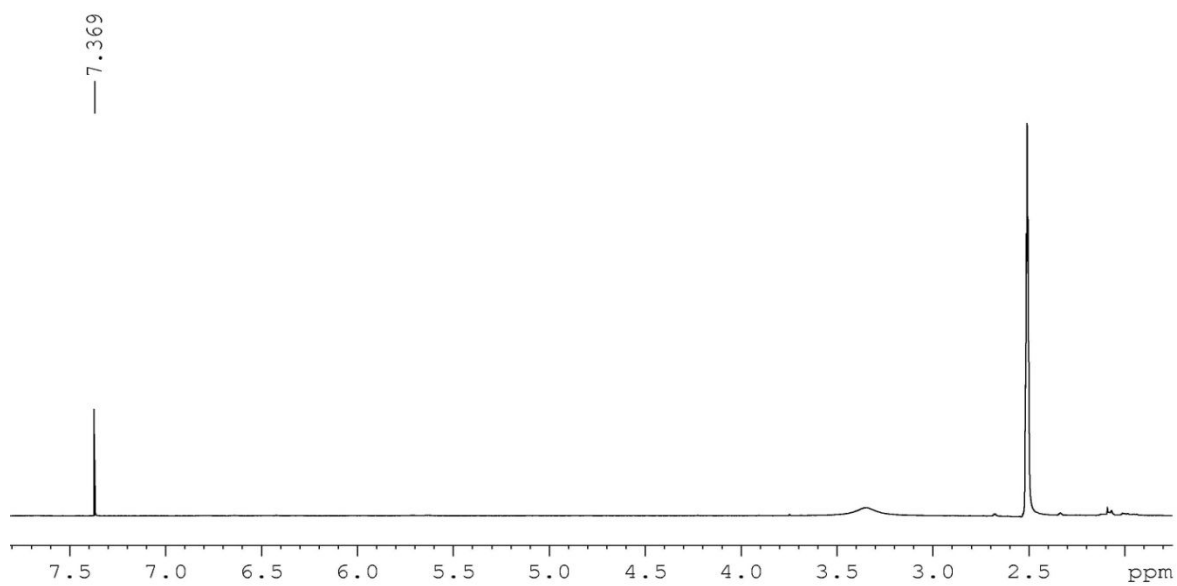 $^1\text{H}$  NMR spectrum of dibromothiophene (VIII) in  $\text{DMSO-}d_6$ 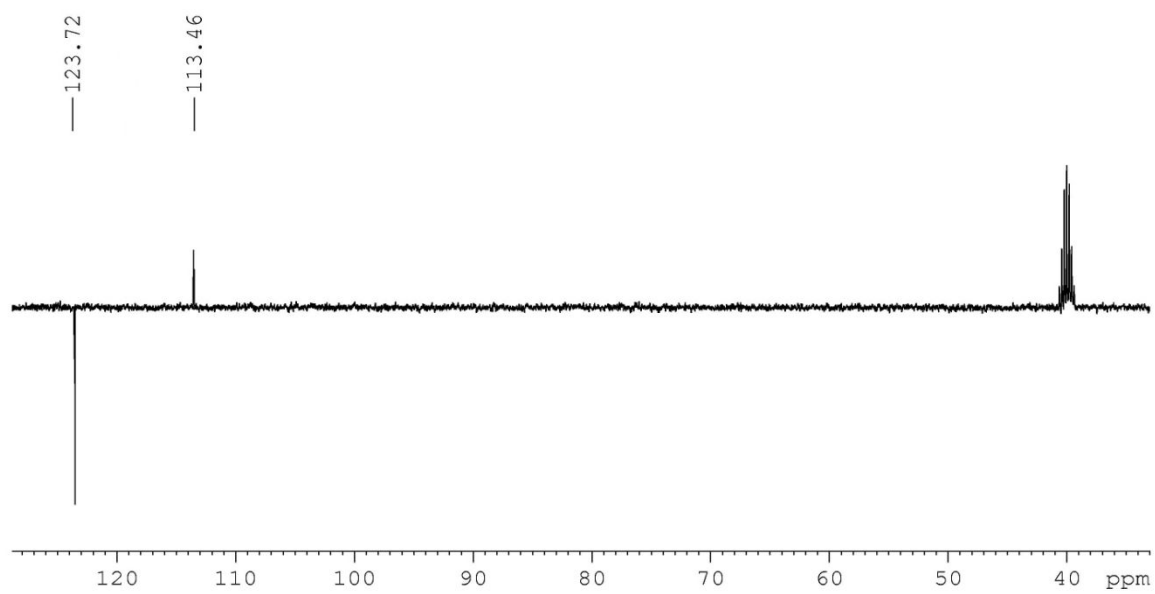 $^{13}\text{C}$  NMR spectrum of dibromothiophene (VIII) in  $\text{DMSO-}d_6$

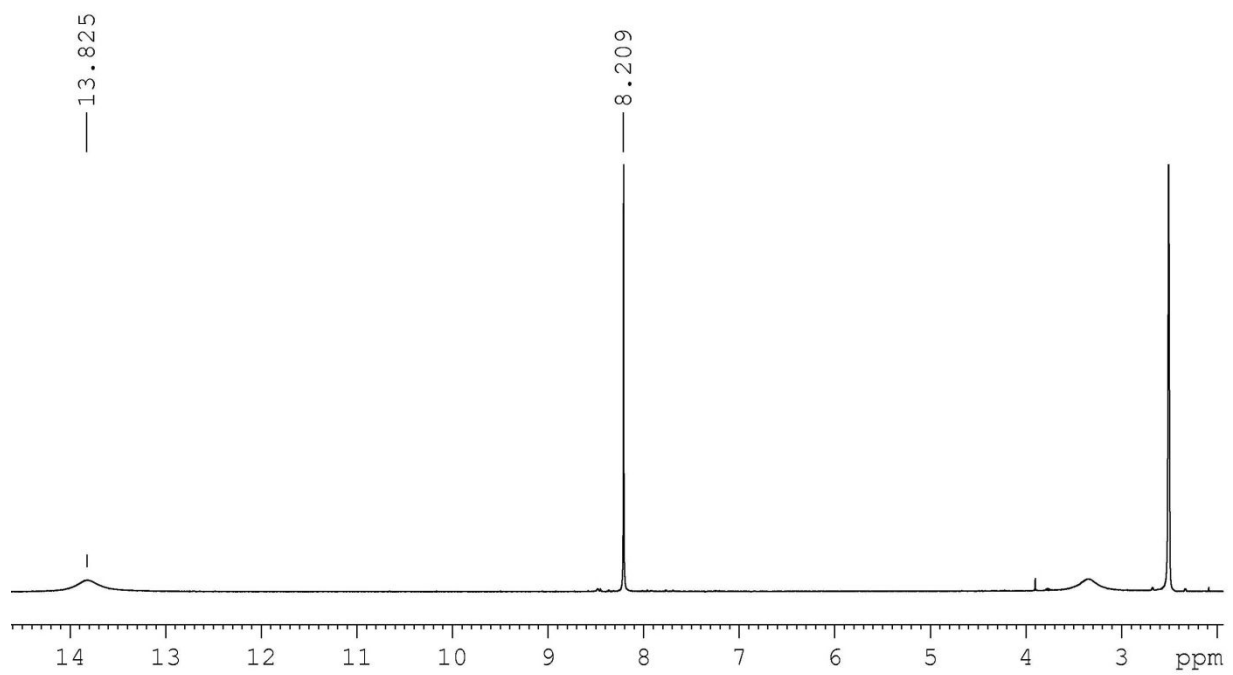

$^1\text{H}$  NMR spectrum of dibromothiophene carboxylic acid (**IV**) derived by carboxylation, in  $\text{DMSO}-d_6$

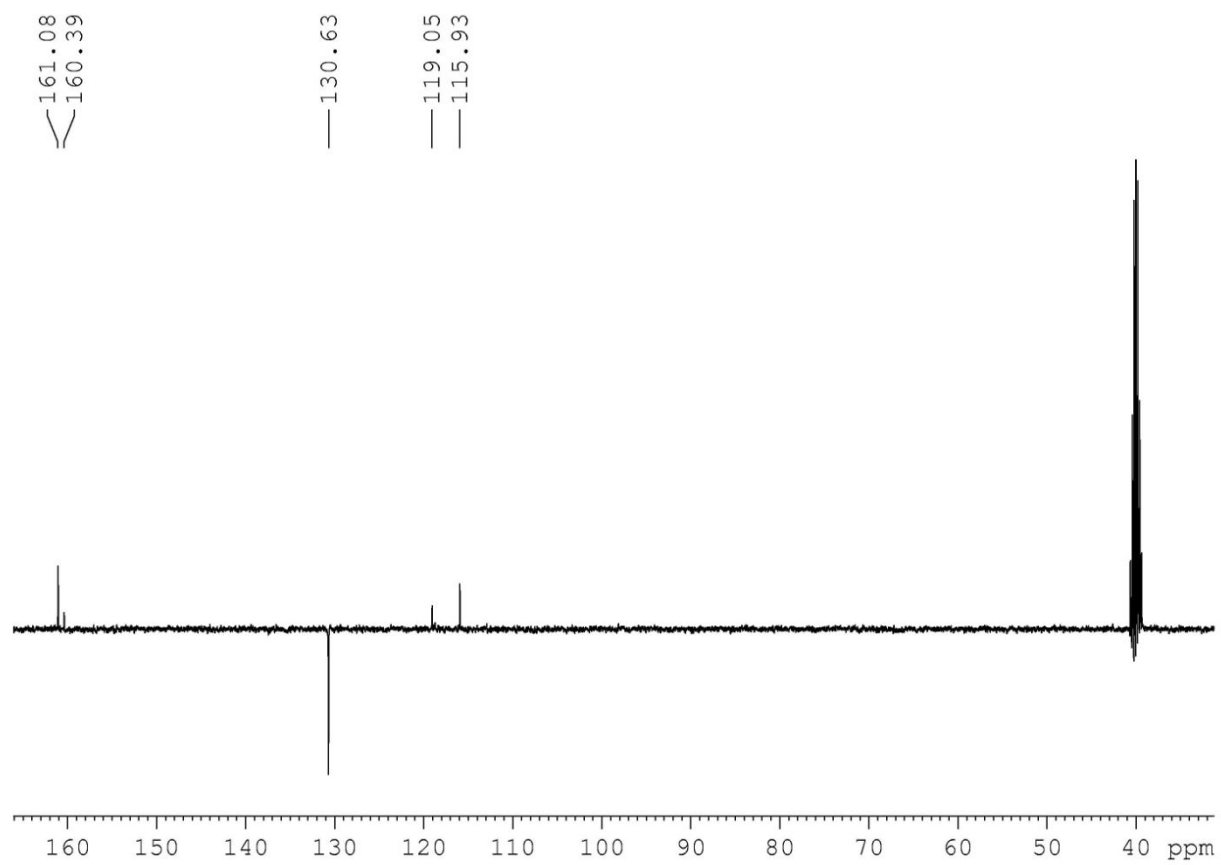

$^{13}\text{C}$  NMR spectrum of dibromothiophene carboxylic acid (**IV**) derived by carboxylation, in  $\text{DMSO-}d_6$

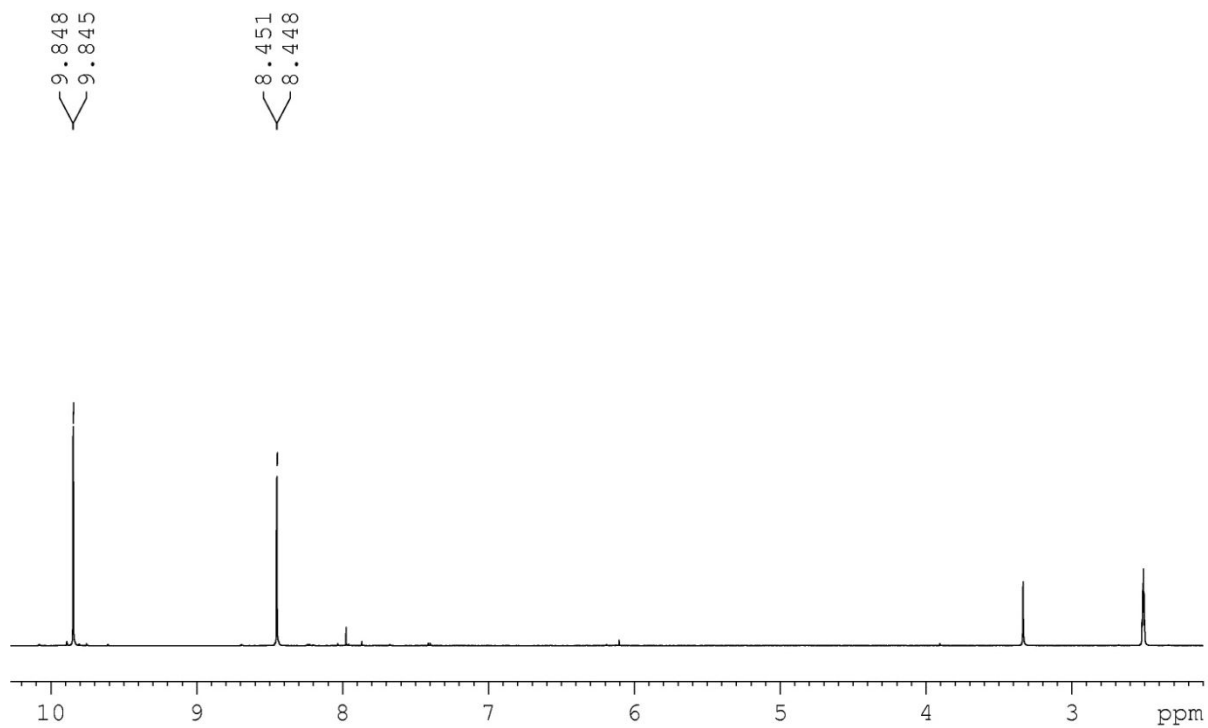

$^1\text{H}$  NMR spectrum of dibromothiophene aldehyde (**IX**) in  $\text{DMSO}-d_6$

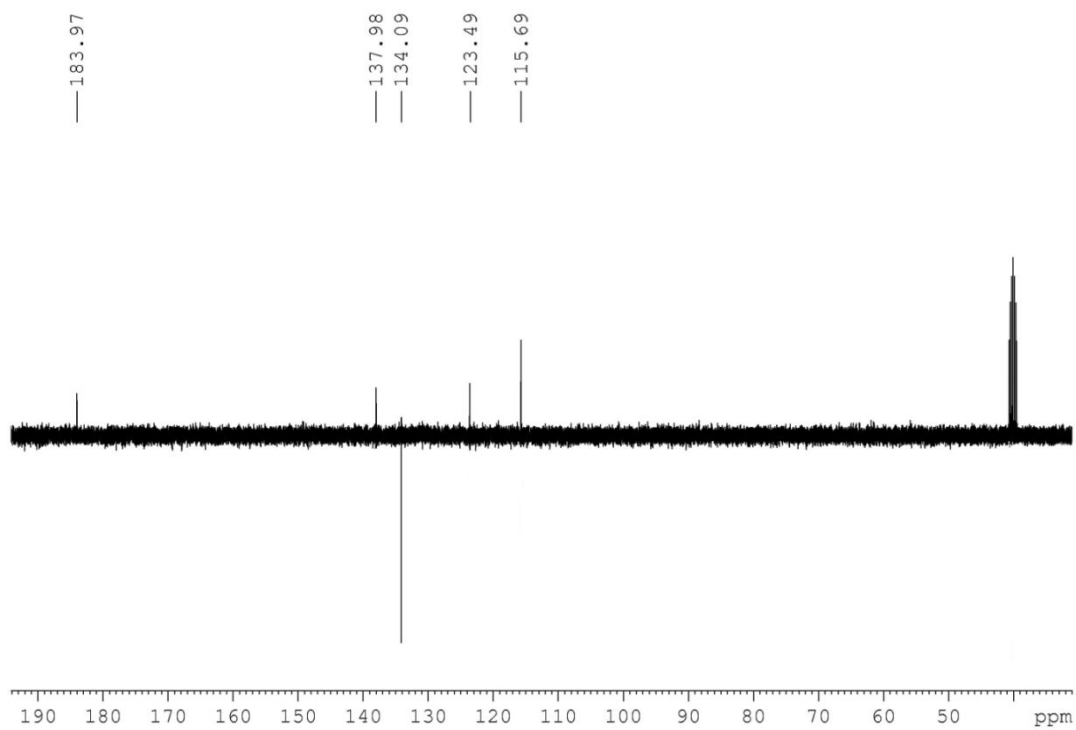

$^{13}\text{C}$  NMR spectrum of dibromothiophene aldehyde (**IX**) in  $\text{DMSO}-d_6$

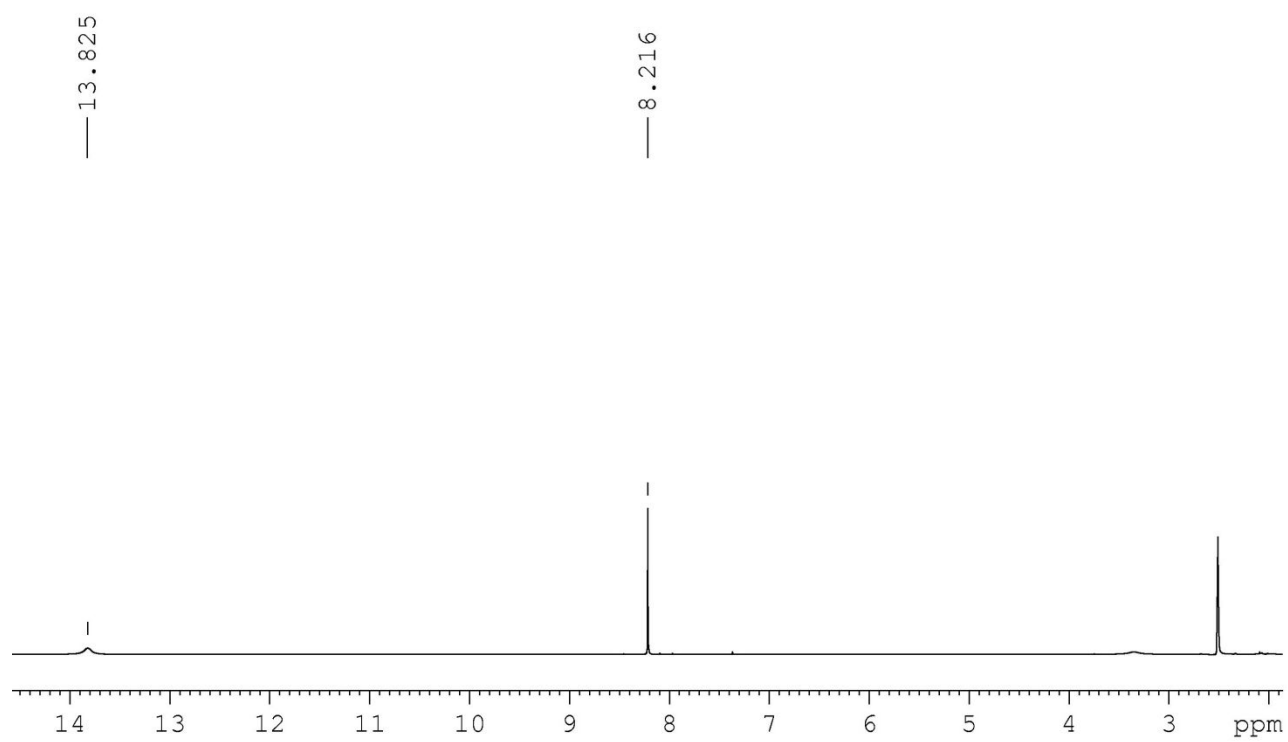

$^1\text{H}$  NMR spectrum of dibromothiophene carboxylic acid (**IV**) derived from dibromothiophene aldehyde, in  $\text{DMSO-}d_6$

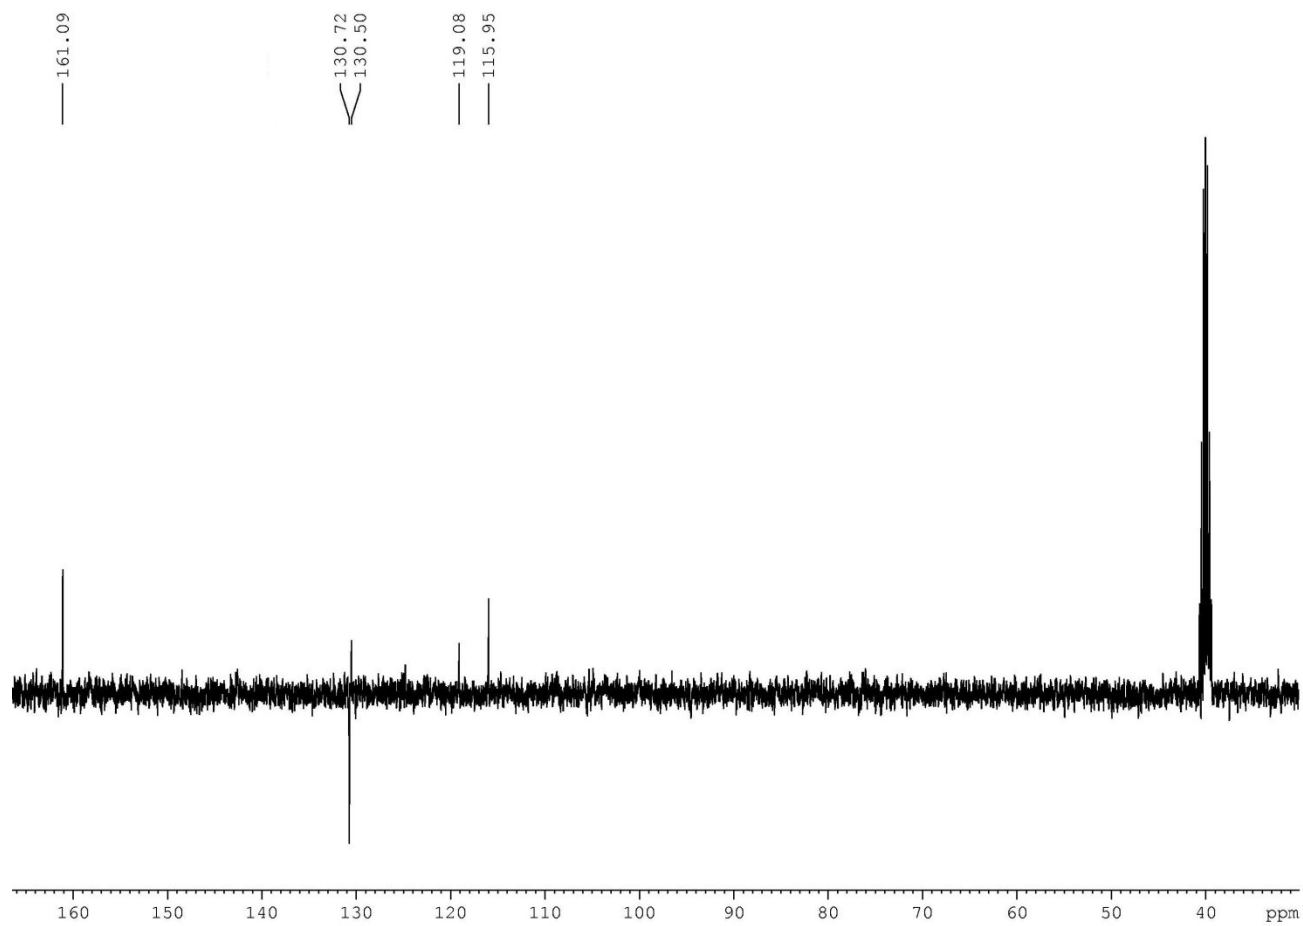

$^{13}\text{C}$  NMR spectrum of dibromothiophene carboxylic acid (**IV**) derived from dibromothiophene aldehyde, in  $\text{DMSO-}d_6$

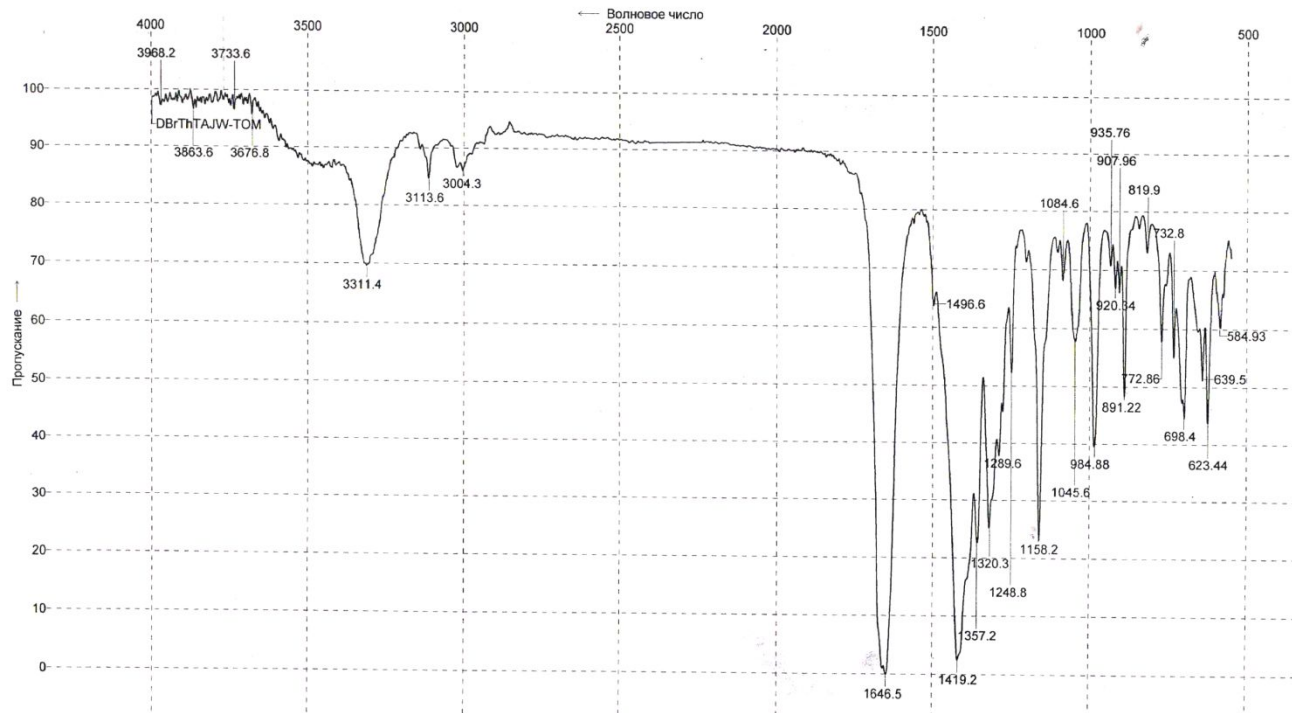

IR spectrum of thiowurtzine (I)

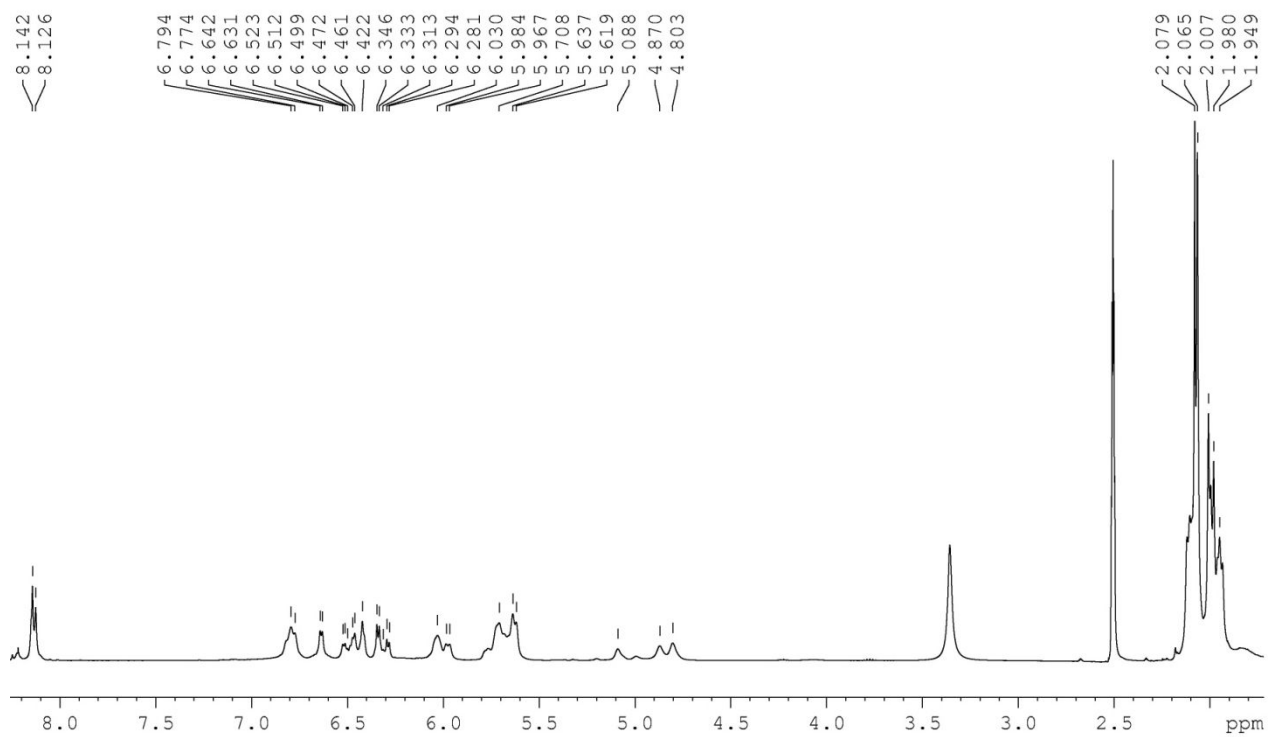

<sup>1</sup>H NMR spectrum of thiowurtzine (I) in DMSO-*d*<sub>6</sub>



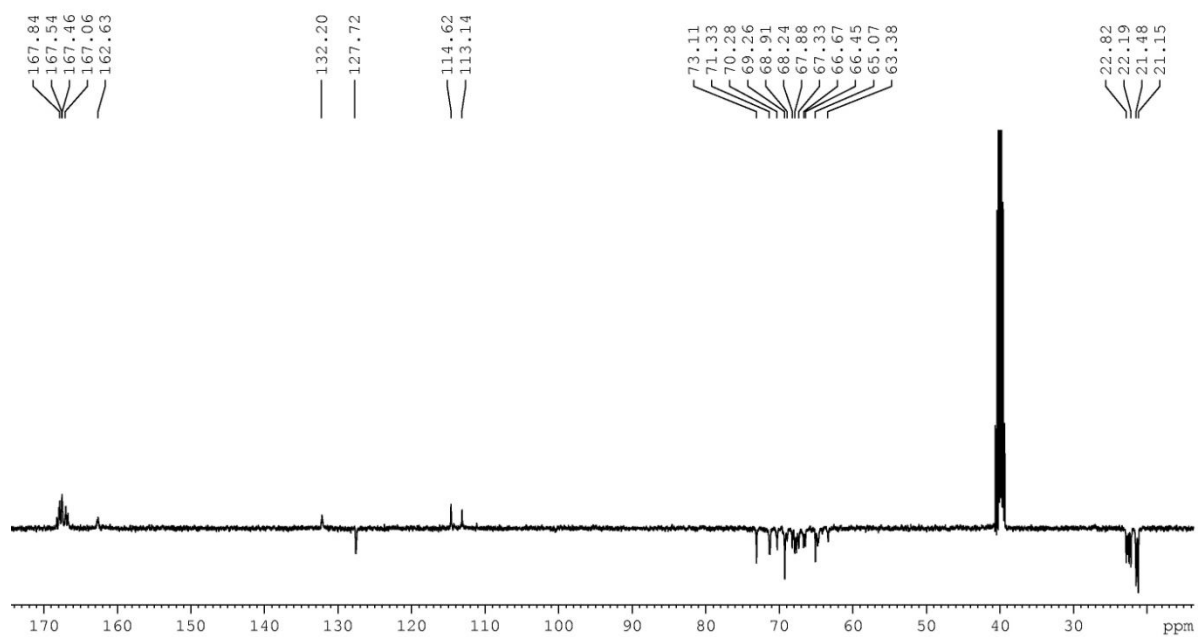

$^{13}\text{C}$  NMR spectrum of thioiwurtzine (**I**) in  $\text{DMSO}-d_6$

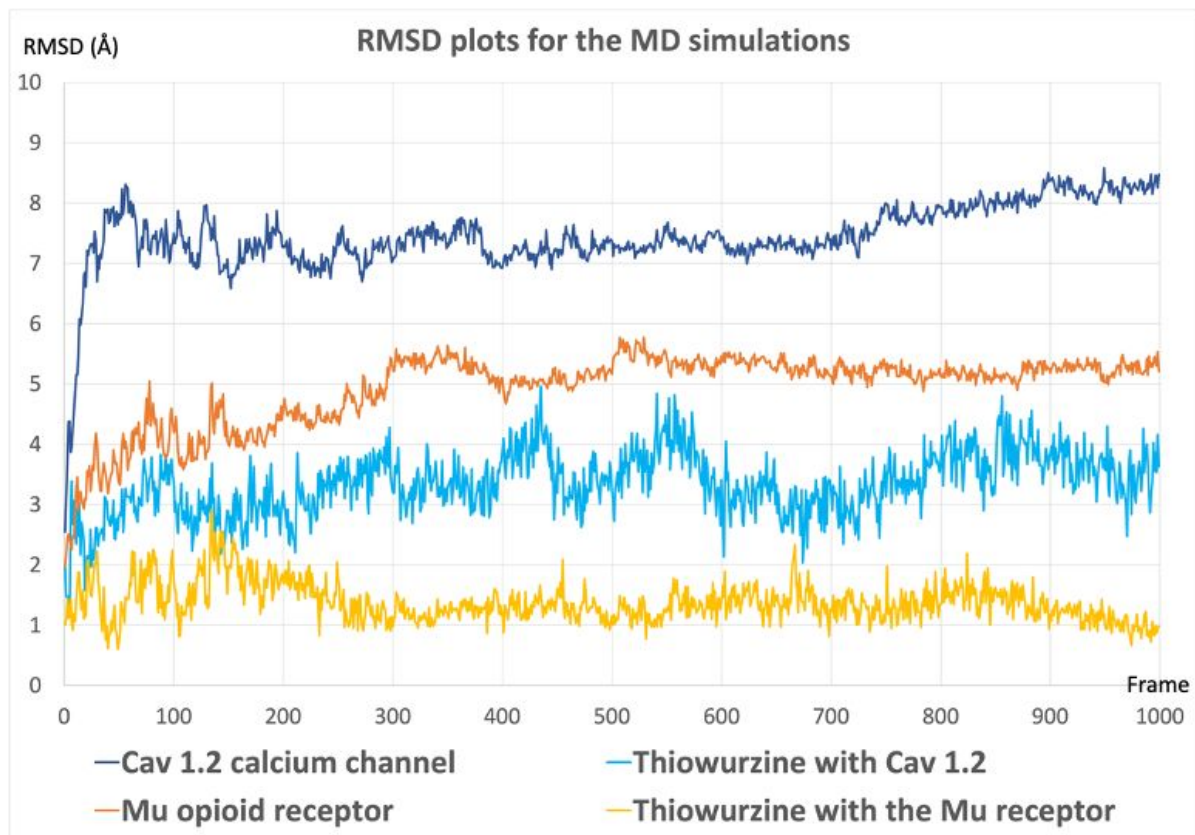

Supplement: ao1c01786_si_001.pdf [file ao1c01786_si_001.pdf]
